# Supplementary material
Source: PubMed Central journal article supplement (PMC3586234)
Supplement: NIHMS387348-supplement-01.pdf [file NIHMS387348-supplement-01.pdf]

Supplemental Online Material Table 1. *Partial correlations between gestational androgens and juvenile male offsprings' play behaviors controlling for family size*

| <b>Males</b>            | df | First Semester<br>A4 | Second<br>Semester A4 | First Semester<br>T-DHT | Second Semester<br>T-DHT |
|-------------------------|----|----------------------|-----------------------|-------------------------|--------------------------|
| Initiate Play           | 10 | 0.29                 | 0.25                  | 0.17                    | 0.1                      |
| Receive Play            | 11 | -0.25                | <b>-0.61*</b>         | -0.54†                  | <b>-0.77**</b>           |
| Overall Play            | 10 | 0.04                 | -0.33                 | -0.17                   | -0.35                    |
| Initiate Play Twin      | 6  | -0.15                | -0.17                 | -0.63                   | -0.49                    |
| Receive Play Twin       | 6  | -0.38                | -0.53                 | <b>-0.72*</b>           | <b>-0.74*</b>            |
| Overall Play Twin       | 5  | -0.41                | -0.49                 | -0.19                   | -0.39                    |
| Initiate Play Sib       | 8  | 0.31                 | 0.12                  | 0.29                    | 0.31                     |
| Receive Play Sib        | 9  | -0.4                 | <b>-0.61*</b>         | -0.09                   | -0.59†                   |
| Overall Play Sib        | 9  | -0.13                | -0.39                 | -0.48                   | <b>-0.63*</b>            |
| Initiate PlayMother     | 11 | 0.49                 | <b>0.6*</b>           | -0.05                   | 0.33                     |
| Receive Play Mother     | 9  | -0.46                | -0.56                 | -0.16                   | -0.31                    |
| Overall Play Mother     | 9  | -0.11                | 0.42                  | -0.15                   | -0.02                    |
| Initiate Play Father    | 9  | <b>0.80**</b>        | <b>0.65*</b>          | -0.05                   | 0.3                      |
| Receive Play Father     | 11 | 0                    | -0.22                 | -0.21                   | -0.19                    |
| Overall Play Father     | 10 | 0.11                 | -0.06                 | -0.4                    | -0.29                    |
| Initiate Play Male Sib‡ | 7  | -0.23                | <b>-0.82**</b>        | <b>-0.68*</b>           | <b>-0.89*</b>            |
| Receive Play Male Sib‡  | 7  | -0.08                | -0.46                 | 0.48                    | 0.03                     |
| Overall Play Male Sib‡  | 7  | -0.08                | <b>-0.9**</b>         | -0.52                   | <b>-0.79*</b>            |

Note. df = degrees of freedom; \* p < .05; \*\* p < .01; † p < .07; ‡ the number of male siblings in the group was the control variable, rather than family size.
