# Supplementary material
Source: PubMed Central journal article supplement (PMC3586234)
Supplement: NIHMS387348-supplement-02.pdf [file NIHMS387348-supplement-02.pdf]

Supplemental Online Material Table 2. *Partial correlations between gestational androgens and juvenile female offsprings' play behaviors controlling for family size*

| <b>Males</b>            | df | First Semester<br>A4 | Second<br>Semester A4 | First Semester<br>T-DHT | Second Semester<br>T-DHT |
|-------------------------|----|----------------------|-----------------------|-------------------------|--------------------------|
| Initiate Play           | 9  | 0.03                 | -0.2                  | 0.16                    | -0.38                    |
| Receive Play            | 10 | -0.01                | -0.2                  | -0.42                   | -0.47                    |
| Overall Play            | 9  | 0.07                 | -0.15                 | 0.05                    | -0.38                    |
| Initiate Play Twin      | 8  | -0.36                | -0.55                 | -0.44                   | -0.55                    |
| Receive Play Twin       | 7  | 0.29                 | 0.14                  | 0.28                    | 0.45                     |
| Overall Play Twin       | 7  | -0.03                | -0.29                 | 0.27                    | 0.18                     |
| Initiate Play Sib       | 9  | -0.05                | -0.27                 | 0.06                    | -0.38                    |
| Receive Play Sib        | 10 | 0.03                 | -0.17                 | -0.22                   | -0.38                    |
| Overall Play Sib        | 10 | -0.04                | -0.26                 | -0.4                    | -0.48                    |
| Initiate PlayMother     | 10 | 0.07                 | 0.03                  | 0.06                    | -0.09                    |
| Receive Play Mother     | 10 | -0.54                | -0.46                 | -0.21                   | -0.38                    |
| Overall Play Mother     | 10 | -0.03                | -0.07                 | 0.01                    | -0.18                    |
| Initiate Play Father    | 10 | 0.71                 | 0.61                  | 0.19                    | 0.01                     |
| Receive Play Father     | 10 | -0.06                | -0.27                 | -0.29                   | -0.32                    |
| Overall Play Father     | 10 | 0.18                 | -0.06                 | 0.01                    | -0.18                    |
| Initiate Play Male Sib‡ | 9  | -0.3                 | -0.42                 | -0.13                   | -0.41                    |
| Receive Play Male Sib‡  | 9  | -0.05                | -0.21                 | -0.2                    | -0.39                    |
| Overall Play Male Sib‡  | 9  | -0.13                | -0.3                  | -0.18                   | -0.43                    |

Note. df = degrees of freedom; ‡ the number of male siblings in the group was the control variable, rather than family size.
