# Supplementary material
Source: PubMed Central journal article supplement (PMC3586234)
Supplement: NIHMS387348-supplement-06.pdf [file NIHMS387348-supplement-06.pdf]

## Regression tables predicting play behaviors from second semester gestational T-DHT levels

|                       |                                              | <b>b</b> | <b>SE (b)</b> | <b><math>\beta</math></b> | <b><i>t</i></b> | <b><i>p</i></b> | <b>95% CI</b>  | <b>R</b> | <b>R<sup>2</sup></b> | <b>Adjusted R<sup>2</sup></b> | <b>SE (estimate)</b> | <b>R<sup>2</sup> <math>\Delta</math></b> | <b>F <math>\Delta</math></b> | <b>df</b> | <b>Sig. F <math>\Delta</math></b> |
|-----------------------|----------------------------------------------|----------|---------------|---------------------------|-----------------|-----------------|----------------|----------|----------------------|-------------------------------|----------------------|------------------------------------------|------------------------------|-----------|-----------------------------------|
| <b>Initiate Play*</b> | <b>Intercept Model 1</b>                     | 2.40     | 0.62          |                           | 3.84            | 0.00            | [1.11, 3.69]   | 0.23     | 0.05                 | 0.01                          | 0.98                 | 0.05                                     | 1.25                         | 1, 23     | 0.28                              |
|                       | Number of play partners present              | -0.13    | 0.12          | -0.23                     | -1.12           | 0.28            | [-0.37, 0.12]  |          |                      |                               |                      |                                          |                              |           |                                   |
|                       | <b>Intercept Model 2</b>                     | 1.92     | 0.54          |                           | 3.55            | 0.00            | [0.81, 3.05]   | 0.61     | 0.37                 | 0.31                          | 0.82                 | 0.31                                     | 10.91                        | 1, 22     | 0.00                              |
|                       | Number of play partners present              | -0.04    | 0.10          | -0.07                     | -0.41           | 0.69            | [-0.25, 0.17]  |          |                      |                               |                      |                                          |                              |           |                                   |
|                       | Sex                                          | 0.56     | 0.17          | 0.58                      | 3.30            | 0.00            | [0.21, 0.92]   |          |                      |                               |                      |                                          |                              |           |                                   |
|                       | <b>Intercept Model 3</b>                     | 1.89     | 0.56          |                           | 3.36            | 0.00            | [0.72, 3.06]   | 0.61     | 0.37                 | 0.28                          | 0.84                 | 0.00                                     | 0.10                         | 1, 21     | 0.75                              |
|                       | Number of play partners present              | -0.03    | 0.10          | -0.06                     | -0.33           | 0.75            | [-0.26, 0.19]  |          |                      |                               |                      |                                          |                              |           |                                   |
|                       | Sex                                          | 0.57     | 0.18          | 0.59                      | 3.24            | 0.00            | [0.21, 0.95]   |          |                      |                               |                      |                                          |                              |           |                                   |
|                       | Second semester gestational T-DHT (Centered) | 0.18     | 0.58          | 0.06                      | 0.32            | 0.75            | [-1.03, 1.4]   |          |                      |                               |                      |                                          |                              |           |                                   |
|                       | <b>Intercept Model 4</b>                     | 1.96     | 0.59          |                           | 3.34            | 0.00            | [0.74, 3.19]   | 0.62     | 0.38                 | 0.25                          | 0.85                 | 0.01                                     | 0.31                         | 1, 20     | 0.58                              |
|                       | Number of play partners present              | -0.05    | 0.11          | -0.08                     | -0.42           | 0.68            | [-0.28, 0.19]  |          |                      |                               |                      |                                          |                              |           |                                   |
|                       | Sex                                          | 0.57     | 0.18          | 0.59                      | 3.15            | 0.01            | [0.2, 0.95]    |          |                      |                               |                      |                                          |                              |           |                                   |
|                       | Second semester gestational T-DHT (Centered) | 0.21     | 0.59          | 0.06                      | 0.36            | 0.73            | [-1.03, 1.45]  |          |                      |                               |                      |                                          |                              |           |                                   |
|                       | Sex * gestational T-DHT interaction          | 0.33     | 0.59          | 0.10                      | 0.56            | 0.58            | [-0.91, 1.57]  |          |                      |                               |                      |                                          |                              |           |                                   |
| <hr/>                 |                                              |          |               |                           |                 |                 |                |          |                      |                               |                      |                                          |                              |           |                                   |
|                       |                                              | <b>b</b> | <b>SE (b)</b> | <b><math>\beta</math></b> | <b><i>t</i></b> | <b><i>p</i></b> | <b>95% CI</b>  | <b>R</b> | <b>R<sup>2</sup></b> | <b>Adjusted R<sup>2</sup></b> | <b>SE (estimate)</b> | <b>R<sup>2</sup> <math>\Delta</math></b> | <b>F <math>\Delta</math></b> | <b>df</b> | <b>Sig. F <math>\Delta</math></b> |
| <b>Receive Play</b>   | <b>Intercept Model 1</b>                     | -0.54    | 0.72          |                           | -0.74           | 0.46            | [-2.04, 0.96]  | 0.59     | 0.35                 | 0.33                          | 1.18                 | 0.35                                     | 13.54                        | 1, 25     | 0.00                              |
|                       | Number of play partners present              | 0.50     | 0.13          | 0.59                      | 3.68            | 0.00            | [0.22, 0.78]   |          |                      |                               |                      |                                          |                              |           |                                   |
|                       | <b>Intercept Model 2</b>                     | -0.34    | 0.75          |                           | -0.46           | 0.65            | [-1.9, 1.21]   | 0.61     | 0.38                 | 0.32                          | 1.19                 | 0.02                                     | 0.94                         | 1, 24     | 0.34                              |
|                       | Number of play partners present              | 0.46     | 0.14          | 0.55                      | 3.28            | 0.00            | [0.18, 0.75]   |          |                      |                               |                      |                                          |                              |           |                                   |
|                       | Sex                                          | -0.23    | 0.24          | -0.16                     | -0.97           | 0.34            | [-0.72, 0.26]  |          |                      |                               |                      |                                          |                              |           |                                   |
|                       | <b>Intercept Model 3</b>                     | 0.01     | 0.68          |                           | 0.02            | 0.99            | [-1.4, 1.42]   | 0.73     | 0.53                 | 0.47                          | 1.05                 | 0.16                                     | 7.68                         | 1, 23     | 0.01                              |
|                       | Number of play partners present              | 0.39     | 0.13          | 0.47                      | 3.10            | 0.01            | [0.13, 0.66]   |          |                      |                               |                      |                                          |                              |           |                                   |
|                       | Sex                                          | -0.34    | 0.21          | -0.24                     | -1.60           | 0.12            | [-0.79, 0.11]  |          |                      |                               |                      |                                          |                              |           |                                   |
|                       | Second semester gestational T-DHT (Centered) | -1.94    | 0.70          | -0.41                     | -2.77           | 0.01            | [-3.39, -0.5]  |          |                      |                               |                      |                                          |                              |           |                                   |
|                       | <b>Intercept Model 4</b>                     | 0.01     | 0.71          |                           | 0.02            | 0.99            | [-1.47, 1.49]  | 0.73     | 0.53                 | 0.45                          | 1.07                 | 0.00                                     | 0.00                         | 1, 22     | 0.99                              |
|                       | Number of play partners present              | 0.39     | 0.13          | 0.47                      | 2.97            | 0.01            | [0.12, 0.67]   |          |                      |                               |                      |                                          |                              |           |                                   |
|                       | Sex                                          | -0.34    | 0.22          | -0.24                     | -1.56           | 0.13            | [-0.8, 0.12]   |          |                      |                               |                      |                                          |                              |           |                                   |
|                       | Second semester gestational T-DHT (Centered) | -1.94    | 0.72          | -0.41                     | -2.70           | 0.01            | [-3.43, -0.46] |          |                      |                               |                      |                                          |                              |           |                                   |
|                       | Sex * gestational T-DHT interaction          | 0.01     | 0.72          | 0.00                      | 0.01            | 0.99            | [-1.49, 1.5]   |          |                      |                               |                      |                                          |                              |           |                                   |
| <hr/>                 |                                              |          |               |                           |                 |                 |                |          |                      |                               |                      |                                          |                              |           |                                   |
|                       |                                              | <b>b</b> | <b>SE (b)</b> | <b><math>\beta</math></b> | <b><i>t</i></b> | <b><i>p</i></b> | <b>95% CI</b>  | <b>R</b> | <b>R<sup>2</sup></b> | <b>Adjusted R<sup>2</sup></b> | <b>SE (estimate)</b> | <b>R<sup>2</sup> <math>\Delta</math></b> | <b>F <math>\Delta</math></b> | <b>df</b> | <b>Sig. F <math>\Delta</math></b> |
| <b>Overall Play*</b>  | <b>Intercept Model 1</b>                     | 1.29     | 0.84          |                           | 1.53            | 0.14            | [-0.46, 3.03]  | 0.48     | 0.23                 | 0.19                          | 1.32                 | 0.23                                     | 6.75                         | 1, 23     | 0.02                              |
|                       | Number of play partners present              | 0.41     | 0.16          | 0.48                      | 2.60            | 0.02            | [0.09, 0.73]   |          |                      |                               |                      |                                          |                              |           |                                   |
|                       | <b>Intercept Model 2</b>                     | 0.98     | 0.86          |                           | 1.14            | 0.27            | [-0.8, 2.75]   | 0.54     | 0.29                 | 0.22                          | 1.29                 | 0.06                                     | 1.86                         | 1, 22     | 0.19                              |
|                       | Number of play partners present              | 0.46     | 0.16          | 0.54                      | 2.91            | 0.01            | [0.14, 0.8]    |          |                      |                               |                      |                                          |                              |           |                                   |
|                       | Sex                                          | 0.37     | 0.27          | 0.25                      | 1.36            | 0.19            | [-0.2, 0.93]   |          |                      |                               |                      |                                          |                              |           |                                   |
|                       | <b>Intercept Model 3</b>                     | 1.09     | 0.88          |                           | 1.23            | 0.23            | [-0.75, 2.93]  | 0.55     | 0.30                 | 0.20                          | 1.31                 | 0.01                                     | 0.45                         | 1, 21     | 0.51                              |
|                       | Number of play partners present              | 0.44     | 0.16          | 0.52                      | 2.69            | 0.01            | [0.11, 0.79]   |          |                      |                               |                      |                                          |                              |           |                                   |
|                       | Sex                                          | 0.33     | 0.28          | 0.23                      | 1.20            | 0.24            | [-0.25, 0.92]  |          |                      |                               |                      |                                          |                              |           |                                   |
|                       | Second semester gestational T-DHT (Centered) | -0.61    | 0.91          | -0.13                     | -0.67           | 0.51            | [-2.51, 1.29]  |          |                      |                               |                      |                                          |                              |           |                                   |
|                       | <b>Intercept Model 4</b>                     | 0.99     | 0.92          |                           | 1.08            | 0.29            | [-0.94, 2.92]  | 0.56     | 0.31                 | 0.17                          | 1.34                 | 0.01                                     | 0.21                         | 1, 20     | 0.65                              |
|                       | Number of play partners present              | 0.46     | 0.17          | 0.54                      | 2.68            | 0.01            | [0.11, 0.82]   |          |                      |                               |                      |                                          |                              |           |                                   |
|                       | Sex                                          | 0.34     | 0.28          | 0.23                      | 1.19            | 0.25            | [-0.26, 0.93]  |          |                      |                               |                      |                                          |                              |           |                                   |
|                       | Second semester gestational T-DHT (Centered) | -0.64    | 0.93          | -0.13                     | -0.69           | 0.50            | [-2.59, 1.3]   |          |                      |                               |                      |                                          |                              |           |                                   |
|                       | Sex * gestational T-DHT interaction          | -0.43    | 0.93          | -0.09                     | -0.46           | 0.65            | [-2.38, 1.52]  |          |                      |                               |                      |                                          |                              |           |                                   |

|                                     |                                              | <b>b</b> | <b>SE (b)</b> | <b>β</b> | <i>t</i> | <i>p</i>       | <b>95% CI</b> | <b>R</b> | <b>R<sup>2</sup></b> | <b>Adjusted R<sup>2</sup></b> | <b>SE (estimate)</b> | <b>R<sup>2</sup> Δ</b> | <b>F Δ</b> | <b>df</b> | <b>Sig. F Δ</b> |
|-------------------------------------|----------------------------------------------|----------|---------------|----------|----------|----------------|---------------|----------|----------------------|-------------------------------|----------------------|------------------------|------------|-----------|-----------------|
| <b>Initiate PlayTwin</b>            | <b>Intercept Model 1</b>                     | 1.09     | 0.88          |          | 1.23     | 0.23           | [-0.77, 2.96] | 0.04     | 0.00                 | -0.05                         | 1.24                 | 0.00                   | 0.03       | 1, 18     | 0.88            |
|                                     | Number of play partners present              | 0.03     | 0.16          | 0.04     | 0.16     | 0.88           | [-0.32, 0.38] |          |                      |                               |                      |                        |            |           |                 |
|                                     | <b>Intercept Model 2</b>                     | 0.62     | 0.84          |          | 0.74     | 0.47           | [-1.16, 2.39] | 0.46     | 0.21                 | 0.12                          | 1.13                 | 0.21                   | 4.51       | 1, 17     | 0.05            |
|                                     | Number of play partners present              | 0.11     | 0.16          | 0.16     | 0.73     | 0.47           | [-0.22, 0.45] |          |                      |                               |                      |                        |            |           |                 |
|                                     | Sex                                          | 0.56     | 0.26          | 0.47     | 2.12     | 0.05           | [0.01, 1.12]  |          |                      |                               |                      |                        |            |           |                 |
|                                     | <b>Intercept Model 3</b>                     | 0.85     | 0.83          |          | 1.03     | 0.32           | [-0.91, 2.61] | 0.55     | 0.30                 | 0.17                          | 1.09                 | 0.09                   | 2.16       | 1, 16     | 0.16            |
|                                     | Number of play partners present              | 0.07     | 0.15          | 0.10     | 0.45     | 0.66           | [-0.26, 0.4]  |          |                      |                               |                      |                        |            |           |                 |
|                                     | Sex                                          | 0.49     | 0.26          | 0.41     | 1.88     | 0.08           | [-0.07, 1.05] |          |                      |                               |                      |                        |            |           |                 |
|                                     | Second semester gestational T-DHT (Centered) | -1.25    | 0.85          | -0.32    | -1.47    | 0.16           | [-3.07, 0.56] |          |                      |                               |                      |                        |            |           |                 |
|                                     | <b>Intercept Model 4</b>                     | 0.66     | 0.85          |          | 0.78     | 0.45           | [-1.15, 2.48] | 0.59     | 0.35                 | 0.17                          | 1.10                 | 0.04                   | 0.96       | 1, 15     | 0.34            |
|                                     | Number of play partners present              | 0.10     | 0.16          | 0.14     | 0.63     | 0.54           | [-0.24, 0.44] |          |                      |                               |                      |                        |            |           |                 |
|                                     | Sex                                          | 0.50     | 0.26          | 0.42     | 1.92     | 0.07           | [-0.06, 1.06] |          |                      |                               |                      |                        |            |           |                 |
|                                     | Second semester gestational T-DHT (Centered) | -1.32    | 0.86          | -0.33    | -1.54    | 0.14           | [-3.15, 0.51] |          |                      |                               |                      |                        |            |           |                 |
| Sex * gestational T-DHT interaction | -0.84                                        | 0.86     | -0.21         | -0.98    | 0.34     | [-2.68, 0.99]  |               |          |                      |                               |                      |                        |            |           |                 |
|                                     |                                              | <b>b</b> | <b>SE (b)</b> | <b>β</b> | <i>t</i> | <i>p</i>       | <b>95% CI</b> | <b>R</b> | <b>R<sup>2</sup></b> | <b>Adjusted R<sup>2</sup></b> | <b>SE (estimate)</b> | <b>R<sup>2</sup> Δ</b> | <b>F Δ</b> | <b>df</b> | <b>Sig. F Δ</b> |
| <b>Receive Twin*</b>                | <b>Intercept Model 1</b>                     | 1.06     | 0.45          |          | 2.38     | 0.03           | [0.12, 2.01]  | 0.08     | 0.01                 | -0.05                         | 0.61                 | 0.01                   | 0.10       | 1, 17     | 0.75            |
|                                     | Number of play partners present              | -0.03    | 0.08          | -0.08    | -0.32    | 0.75           | [-0.21, 0.15] |          |                      |                               |                      |                        |            |           |                 |
|                                     | <b>Intercept Model 2</b>                     | 1.27     | 0.44          |          | 2.92     | 0.01           | [0.35, 2.2]   | 0.42     | 0.18                 | 0.07                          | 0.57                 | 0.17                   | 3.30       | 1, 16     | 0.09            |
|                                     | Number of play partners present              | -0.07    | 0.08          | -0.19    | -0.81    | 0.43           | [-0.24, 0.11] |          |                      |                               |                      |                        |            |           |                 |
|                                     | Sex                                          | -0.25    | 0.14          | -0.43    | -1.82    | 0.09           | [-0.54, 0.05] |          |                      |                               |                      |                        |            |           |                 |
|                                     | <b>Intercept Model 3</b>                     | 1.34     | 0.45          |          | 2.97     | 0.01           | [0.38, 2.3]   | 0.45     | 0.21                 | 0.05                          | 0.58                 | 0.03                   | 0.55       | 1, 15     | 0.47            |
|                                     | Number of play partners present              | -0.08    | 0.08          | -0.23    | -0.93    | 0.37           | [-0.26, 0.11] |          |                      |                               |                      |                        |            |           |                 |
|                                     | Sex                                          | -0.27    | 0.14          | -0.46    | -1.90    | 0.08           | [-0.58, 0.04] |          |                      |                               |                      |                        |            |           |                 |
|                                     | Second semester gestational T-DHT (Centered) | -0.34    | 0.46          | -0.18    | -0.74    | 0.47           | [-1.34, 0.65] |          |                      |                               |                      |                        |            |           |                 |
|                                     | <b>Intercept Model 4</b>                     | 1.11     | 0.39          |          | 2.82     | 0.01           | [0.27, 1.96]  | 0.68     | 0.46                 | 0.31                          | 0.49                 | 0.26                   | 6.62       | 1, 14     | 0.02            |
|                                     | Number of play partners present              | -0.04    | 0.07          | -0.12    | -0.58    | 0.57           | [-0.2, 0.12]  |          |                      |                               |                      |                        |            |           |                 |
|                                     | Sex                                          | -0.25    | 0.12          | -0.44    | -2.10    | 0.05           | [-0.52, 0.01] |          |                      |                               |                      |                        |            |           |                 |
|                                     | Second semester gestational T-DHT (Centered) | -0.42    | 0.40          | -0.22    | -1.07    | 0.30           | [-1.28, 0.43] |          |                      |                               |                      |                        |            |           |                 |
| Sex * gestational T-DHT interaction | -1.02                                        | 0.40     | -0.52         | -2.57    | 0.02     | [-1.88, -0.18] |               |          |                      |                               |                      |                        |            |           |                 |
|                                     |                                              | <b>b</b> | <b>SE (b)</b> | <b>β</b> | <i>t</i> | <i>p</i>       | <b>95% CI</b> | <b>R</b> | <b>R<sup>2</sup></b> | <b>Adjusted R<sup>2</sup></b> | <b>SE (estimate)</b> | <b>R<sup>2</sup> Δ</b> | <b>F Δ</b> | <b>df</b> | <b>Sig. F Δ</b> |
| <b>Overall Play Twin*</b>           | <b>Intercept Model 1</b>                     | 2.17     | 0.45          |          | 4.82     | 0.00           | [1.22, 3.13]  | 0.21     | 0.05                 | -0.01                         | 0.60                 | 0.05                   | 0.76       | 1, 16     | 0.40            |
|                                     | Number of play partners present              | -0.07    | 0.08          | -0.21    | -0.87    | 0.40           | [-0.26, 0.11] |          |                      |                               |                      |                        |            |           |                 |
|                                     | <b>Intercept Model 2</b>                     | 2.16     | 0.48          |          | 4.47     | 0.00           | [1.13, 3.19]  | 0.22     | 0.05                 | -0.08                         | 0.62                 | 0.00                   | 0.01       | 1, 15     | 0.91            |
|                                     | Number of play partners present              | -0.07    | 0.09          | -0.21    | -0.78    | 0.45           | [-0.27, 0.13] |          |                      |                               |                      |                        |            |           |                 |
|                                     | Sex                                          | 0.02     | 0.15          | 0.03     | 0.12     | 0.91           | [-0.31, 0.35] |          |                      |                               |                      |                        |            |           |                 |
|                                     | <b>Intercept Model 3</b>                     | 2.13     | 0.51          |          | 4.20     | 0.00           | [1.05, 3.23]  | 0.22     | 0.05                 | -0.15                         | 0.64                 | 0.00                   | 0.06       | 1, 14     | 0.82            |
|                                     | Number of play partners present              | -0.07    | 0.10          | -0.19    | -0.70    | 0.50           | [-0.27, 0.14] |          |                      |                               |                      |                        |            |           |                 |
|                                     | Sex                                          | 0.03     | 0.16          | 0.04     | 0.15     | 0.88           | [-0.32, 0.37] |          |                      |                               |                      |                        |            |           |                 |
|                                     | Second semester gestational T-DHT (Centered) | 0.12     | 0.52          | 0.06     | 0.24     | 0.82           | [-1, 1.25]    |          |                      |                               |                      |                        |            |           |                 |
|                                     | <b>Intercept Model 4</b>                     | 2.02     | 0.52          |          | 3.87     | 0.00           | [0.9, 3.15]   | 0.34     | 0.12                 | -0.15                         | 0.64                 | 0.07                   | 1.00       | 1, 13     | 0.33            |
|                                     | Number of play partners present              | -0.05    | 0.10          | -0.14    | -0.49    | 0.63           | [-0.26, 0.17] |          |                      |                               |                      |                        |            |           |                 |
|                                     | Sex                                          | 0.03     | 0.16          | 0.06     | 0.20     | 0.84           | [-0.32, 0.38] |          |                      |                               |                      |                        |            |           |                 |
|                                     | Second semester gestational T-DHT (Centered) | 0.08     | 0.53          | 0.04     | 0.16     | 0.88           | [-1.06, 1.22] |          |                      |                               |                      |                        |            |           |                 |
| Sex * gestational T-DHT interaction | -0.53                                        | 0.53     | -0.27         | -1.00    | 0.34     | [-1.67, 0.61]  |               |          |                      |                               |                      |                        |            |           |                 |

|                                     |                                              | <b>b</b> | <b>SE (b)</b> | <b><math>\beta</math></b> | <b><i>t</i></b> | <b><i>p</i></b> | <b>95% CI</b>  | <b>R</b> | <b>R<sup>2</sup></b> | <b>Adjusted R<sup>2</sup></b> | <b>SE (estimate)</b> | <b>R<sup>2</sup> <math>\Delta</math></b> | <b>F <math>\Delta</math></b> | <b>df</b> | <b>Sig. F <math>\Delta</math></b> |
|-------------------------------------|----------------------------------------------|----------|---------------|---------------------------|-----------------|-----------------|----------------|----------|----------------------|-------------------------------|----------------------|------------------------------------------|------------------------------|-----------|-----------------------------------|
| <b>Initiate Play Sib*</b>           | <b>Intercept Model 1</b>                     | 1.20     | 0.62          |                           | 1.94            | 0.07            | [-0.09, 2.5]   | 0.08     | 0.01                 | -0.04                         | 0.93                 | 0.01                                     | 0.13                         | 1, 21     | 0.72                              |
|                                     | Number of play partners present              | 0.04     | 0.12          | 0.08                      | 0.37            | 0.72            | [-0.2, 0.29]   |          |                      |                               |                      |                                          |                              |           |                                   |
|                                     | <b>Intercept Model 2</b>                     | 0.76     | 0.54          |                           | 1.40            | 0.18            | [-0.38, 1.9]   | 0.57     | 0.32                 | 0.26                          | 0.79                 | 0.32                                     | 9.35                         | 1, 20     | 0.01                              |
|                                     | Number of play partners present              | 0.13     | 0.10          | 0.24                      | 1.23            | 0.23            | [-0.09, 0.34]  |          |                      |                               |                      |                                          |                              |           |                                   |
|                                     | Sex                                          | 0.52     | 0.17          | 0.58                      | 3.06            | 0.01            | [0.17, 0.89]   |          |                      |                               |                      |                                          |                              |           |                                   |
|                                     | <b>Intercept Model 3</b>                     | 0.70     | 0.56          |                           | 1.24            | 0.23            | [-0.48, 1.88]  | 0.58     | 0.34                 | 0.23                          | 0.80                 | 0.01                                     | 0.35                         | 1, 19     | 0.56                              |
|                                     | Number of play partners present              | 0.14     | 0.11          | 0.26                      | 1.31            | 0.21            | [-0.09, 0.36]  |          |                      |                               |                      |                                          |                              |           |                                   |
|                                     | Sex                                          | 0.54     | 0.18          | 0.61                      | 3.07            | 0.01            | [0.18, 0.92]   |          |                      |                               |                      |                                          |                              |           |                                   |
|                                     | Second semester gestational T-DHT (Centered) | 0.34     | 0.58          | 0.11                      | 0.59            | 0.56            | [-0.88, 1.56]  |          |                      |                               |                      |                                          |                              |           |                                   |
|                                     | <b>Intercept Model 4</b>                     | 0.77     | 0.59          |                           | 1.30            | 0.21            | [-0.48, 2.01]  | 0.59     | 0.34                 | 0.20                          | 0.82                 | 0.01                                     | 0.26                         | 1, 18     | 0.61                              |
|                                     | Number of play partners present              | 0.13     | 0.11          | 0.24                      | 1.16            | 0.26            | [-0.11, 0.36]  |          |                      |                               |                      |                                          |                              |           |                                   |
|                                     | Sex                                          | 0.54     | 0.18          | 0.60                      | 2.98            | 0.01            | [0.16, 0.92]   |          |                      |                               |                      |                                          |                              |           |                                   |
|                                     | Second semester gestational T-DHT (Centered) | 0.37     | 0.59          | 0.12                      | 0.62            | 0.54            | [-0.88, 1.62]  |          |                      |                               |                      |                                          |                              |           |                                   |
| Sex * gestational T-DHT interaction | 0.31                                         | 0.60     | 0.10          | 0.51                      | 0.61            | [-0.95, 1.56]   |                |          |                      |                               |                      |                                          |                              |           |                                   |
|                                     |                                              | <b>b</b> | <b>SE (b)</b> | <b><math>\beta</math></b> | <b><i>t</i></b> | <b><i>p</i></b> | <b>95% CI</b>  | <b>R</b> | <b>R<sup>2</sup></b> | <b>Adjusted R<sup>2</sup></b> | <b>SE (estimate)</b> | <b>R<sup>2</sup> <math>\Delta</math></b> | <b>F <math>\Delta</math></b> | <b>df</b> | <b>Sig. F <math>\Delta</math></b> |
| <b>Receive Sib</b>                  | <b>Intercept Model 1</b>                     | -1.25    | 1.00          |                           | -1.24           | 0.23            | [-3.32, 0.83]  | 0.66     | 0.44                 | 0.41                          | 1.57                 | 0.44                                     | 18.02                        | 1, 23     | 0.00                              |
|                                     | Number of play partners present              | 0.79     | 0.19          | 0.66                      | 4.25            | 0.00            | [0.41, 1.18]   |          |                      |                               |                      |                                          |                              |           |                                   |
|                                     | <b>Intercept Model 2</b>                     | -1.33    | 1.06          |                           | -1.26           | 0.22            | [-3.54, 0.87]  | 0.67     | 0.44                 | 0.39                          | 1.61                 | 0.00                                     | 0.10                         | 1, 22     | 0.76                              |
|                                     | Number of play partners present              | 0.81     | 0.20          | 0.68                      | 4.09            | 0.00            | [0.4, 1.22]    |          |                      |                               |                      |                                          |                              |           |                                   |
|                                     | Sex                                          | 0.10     | 0.33          | 0.05                      | 0.31            | 0.76            | [-0.59, 0.8]   |          |                      |                               |                      |                                          |                              |           |                                   |
|                                     | <b>Intercept Model 3</b>                     | -0.92    | 1.00          |                           | -0.93           | 0.37            | [-3, 1.16]     | 0.74     | 0.54                 | 0.48                          | 1.48                 | 0.10                                     | 4.72                         | 1, 21     | 0.04                              |
|                                     | Number of play partners present              | 0.73     | 0.19          | 0.61                      | 3.91            | 0.00            | [0.35, 1.12]   |          |                      |                               |                      |                                          |                              |           |                                   |
|                                     | Sex                                          | -0.02    | 0.31          | -0.01                     | -0.08           | 0.94            | [-0.68, 0.63]  |          |                      |                               |                      |                                          |                              |           |                                   |
|                                     | Second semester gestational T-DHT (Centered) | -2.24    | 1.03          | -0.33                     | -2.17           | 0.04            | [-4.38, -0.1]  |          |                      |                               |                      |                                          |                              |           |                                   |
|                                     | <b>Intercept Model 4</b>                     | -0.88    | 1.05          |                           | -0.84           | 0.41            | [-3.07, 1.32]  | 0.74     | 0.55                 | 0.45                          | 1.52                 | 0.00                                     | 0.04                         | 1, 20     | 0.84                              |
|                                     | Number of play partners present              | 0.72     | 0.19          | 0.60                      | 3.71            | 0.00            | [0.32, 1.13]   |          |                      |                               |                      |                                          |                              |           |                                   |
|                                     | Sex                                          | -0.03    | 0.32          | -0.01                     | -0.09           | 0.93            | [-0.7, 0.65]   |          |                      |                               |                      |                                          |                              |           |                                   |
|                                     | Second semester gestational T-DHT (Centered) | -2.22    | 1.06          | -0.33                     | -2.10           | 0.05            | [-4.43, -0.02] |          |                      |                               |                      |                                          |                              |           |                                   |
| Sex * gestational T-DHT interaction | 0.22                                         | 1.06     | 0.03          | 0.20                      | 0.84            | [-2, 2.43]      |                |          |                      |                               |                      |                                          |                              |           |                                   |
|                                     |                                              | <b>b</b> | <b>SE (b)</b> | <b><math>\beta</math></b> | <b><i>t</i></b> | <b><i>p</i></b> | <b>95% CI</b>  | <b>R</b> | <b>R<sup>2</sup></b> | <b>Adjusted R<sup>2</sup></b> | <b>SE (estimate)</b> | <b>R<sup>2</sup> <math>\Delta</math></b> | <b>F <math>\Delta</math></b> | <b>df</b> | <b>Sig. F <math>\Delta</math></b> |
| <b>Overall Play Sib</b>             | <b>Intercept Model 1</b>                     | 0.38     | 1.90          |                           | 0.20            | 0.85            | [-3.56, 4.31]  | 0.48     | 0.23                 | 0.19                          | 2.98                 | 0.23                                     | 6.79                         | 1, 23     | 0.02                              |
|                                     | Number of play partners present              | 0.92     | 0.35          | 0.48                      | 2.61            | 0.02            | [0.19, 1.66]   |          |                      |                               |                      |                                          |                              |           |                                   |
|                                     | <b>Intercept Model 2</b>                     | -0.27    | 1.95          |                           | -0.14           | 0.89            | [-4.31, 3.77]  | 0.53     | 0.28                 | 0.21                          | 2.95                 | 0.05                                     | 1.57                         | 1, 22     | 0.22                              |
|                                     | Number of play partners present              | 1.04     | 0.36          | 0.54                      | 2.88            | 0.01            | [0.3, 1.8]     |          |                      |                               |                      |                                          |                              |           |                                   |
|                                     | Sex                                          | 0.77     | 0.61          | 0.24                      | 1.25            | 0.22            | [-0.51, 2.04]  |          |                      |                               |                      |                                          |                              |           |                                   |
|                                     | <b>Intercept Model 3</b>                     | 0.58     | 1.78          |                           | 0.32            | 0.75            | [-3.13, 4.28]  | 0.67     | 0.45                 | 0.37                          | 2.65                 | 0.17                                     | 6.33                         | 1, 21     | 0.02                              |
|                                     | Number of play partners present              | 0.88     | 0.33          | 0.46                      | 2.65            | 0.02            | [0.19, 1.57]   |          |                      |                               |                      |                                          |                              |           |                                   |
|                                     | Sex                                          | 0.50     | 0.56          | 0.15                      | 0.90            | 0.38            | [-0.67, 1.67]  |          |                      |                               |                      |                                          |                              |           |                                   |
|                                     | Second semester gestational T-DHT (Centered) | -4.62    | 1.83          | -0.42                     | -2.52           | 0.02            | [-8.44, -0.81] |          |                      |                               |                      |                                          |                              |           |                                   |
|                                     | <b>Intercept Model 4</b>                     | 0.57     | 1.87          |                           | 0.31            | 0.76            | [-3.33, 4.48]  | 0.67     | 0.45                 | 0.34                          | 2.71                 | 0.00                                     | 0.00                         | 1, 20     | 0.99                              |
|                                     | Number of play partners present              | 0.88     | 0.35          | 0.46                      | 2.54            | 0.02            | [0.16, 1.61]   |          |                      |                               |                      |                                          |                              |           |                                   |
|                                     | Sex                                          | 0.50     | 0.57          | 0.15                      | 0.87            | 0.39            | [-0.7, 1.71]   |          |                      |                               |                      |                                          |                              |           |                                   |
|                                     | Second semester gestational T-DHT (Centered) | -4.62    | 1.89          | -0.42                     | -2.45           | 0.02            | [-8.56, -0.69] |          |                      |                               |                      |                                          |                              |           |                                   |
| Sex * gestational T-DHT interaction | -0.02                                        | 1.89     | 0.00          | -0.01                     | 0.99            | [-3.97, 3.93]   |                |          |                      |                               |                      |                                          |                              |           |                                   |

|                             |                                              | <b>b</b> | <b>SE (b)</b> | <b>β</b>      | <i>t</i> | <i>p</i> | <b>95% CI</b> | <b>R</b>      | <b>R<sup>2</sup></b> | <b>Adjusted R<sup>2</sup></b> | <b>SE (estimate)</b>          | <b>R<sup>2</sup> Δ</b> | <b>F Δ</b>             | <b>df</b>  | <b>Sig. F Δ</b> |                 |
|-----------------------------|----------------------------------------------|----------|---------------|---------------|----------|----------|---------------|---------------|----------------------|-------------------------------|-------------------------------|------------------------|------------------------|------------|-----------------|-----------------|
| <b>Initiate Play Mother</b> | <b>Intercept Model 1</b>                     | 0.55     | 0.21          |               | 2.67     | 0.01     | [0.13, 0.98]  | 0.30          | 0.09                 | 0.06                          | 0.34                          | 0.09                   | 2.53                   | 1, 25      | 0.12            |                 |
|                             | Number of play partners present              | -0.06    | 0.04          | -0.30         | -1.59    | 0.12     | [-0.15, 0.02] |               |                      |                               |                               |                        |                        |            |                 |                 |
|                             | <b>Intercept Model 2</b>                     | 0.48     | 0.21          |               | 2.26     | 0.03     | [0.05, 0.92]  | 0.39          | 0.15                 | 0.08                          | 0.33                          | 0.06                   | 1.78                   | 1, 24      | 0.19            |                 |
|                             | Number of play partners present              | -0.05    | 0.04          | -0.23         | -1.20    | 0.24     | [-0.13, 0.04] |               |                      |                               |                               |                        |                        |            |                 |                 |
|                             | Sex                                          | 0.09     | 0.07          | 0.26          | 1.33     | 0.19     | [-0.05, 0.23] |               |                      |                               |                               |                        |                        |            |                 |                 |
|                             | <b>Intercept Model 3</b>                     | 0.44     | 0.22          |               | 2.05     | 0.05     | [-0.01, 0.9]  | 0.42          | 0.18                 | 0.07                          | 0.34                          | 0.02                   | 0.69                   | 1, 23      | 0.41            |                 |
|                             | Number of play partners present              | -0.04    | 0.04          | -0.20         | -1.01    | 0.32     | [-0.13, 0.05] |               |                      |                               |                               |                        |                        |            |                 |                 |
|                             | Sex                                          | 0.10     | 0.07          | 0.29          | 1.46     | 0.16     | [-0.05, 0.25] |               |                      |                               |                               |                        |                        |            |                 |                 |
|                             | Second semester gestational T-DHT (Centered) | 0.19     | 0.22          | 0.16          | 0.83     | 0.41     | [-0.28, 0.65] |               |                      |                               |                               |                        |                        |            |                 |                 |
|                             | <b>Intercept Model 4</b>                     | 0.50     | 0.22          |               | 2.29     | 0.03     | [0.05, 0.97]  | 0.48          | 0.23                 | 0.09                          | 0.33                          | 0.05                   | 1.49                   | 1, 22      | 0.23            |                 |
|                             | Number of play partners present              | -0.05    | 0.04          | -0.25         | -1.23    | 0.23     | [-0.14, 0.04] |               |                      |                               |                               |                        |                        |            |                 |                 |
|                             | Sex                                          | 0.10     | 0.07          | 0.28          | 1.42     | 0.17     | [-0.05, 0.24] |               |                      |                               |                               |                        |                        |            |                 |                 |
|                             | Second semester gestational T-DHT (Centered) | 0.21     | 0.22          | 0.18          | 0.93     | 0.36     | [-0.26, 0.67] |               |                      |                               |                               |                        |                        |            |                 |                 |
|                             | Sex * gestational T-DHT interaction          | 0.27     | 0.22          | 0.23          | 1.22     | 0.23     | [-0.19, 0.74] |               |                      |                               |                               |                        |                        |            |                 |                 |
|                             | <hr/>                                        |          |               |               |          |          |               |               |                      |                               |                               |                        |                        |            |                 |                 |
|                             |                                              |          | <b>b</b>      | <b>SE (b)</b> | <b>β</b> | <i>t</i> | <i>p</i>      | <b>95% CI</b> | <b>R</b>             | <b>R<sup>2</sup></b>          | <b>Adjusted R<sup>2</sup></b> | <b>SE (estimate)</b>   | <b>R<sup>2</sup> Δ</b> | <b>F Δ</b> | <b>df</b>       | <b>Sig. F Δ</b> |
| <b>Receive Mother*</b>      | <b>Intercept Model 1</b>                     | 0.05     | 0.03          |               | 1.97     | 0.06     | [-0.01, 0.1]  | 0.17          | 0.03                 | -0.01                         | 0.04                          | 0.03                   | 0.72                   | 1, 23      | 0.41            |                 |
|                             | Number of play partners present              | 0.00     | 0.01          | -0.17         | -0.85    | 0.41     | [-0.02, 0.01] |               |                      |                               |                               |                        |                        |            |                 |                 |
|                             | <b>Intercept Model 2</b>                     | 0.04     | 0.03          |               | 1.63     | 0.12     | [-0.02, 0.1]  | 0.28          | 0.08                 | -0.01                         | 0.04                          | 0.05                   | 1.09                   | 1, 22      | 0.31            |                 |
|                             | Number of play partners present              | 0.00     | 0.01          | -0.12         | -0.54    | 0.60     | [-0.02, 0.01] |               |                      |                               |                               |                        |                        |            |                 |                 |
|                             | Sex                                          | 0.01     | 0.01          | 0.22          | 1.04     | 0.31     | [-0.01, 0.03] |               |                      |                               |                               |                        |                        |            |                 |                 |
|                             | <b>Intercept Model 3</b>                     | 0.05     | 0.02          |               | 2.06     | 0.05     | [0, 0.11]     | 0.46          | 0.21                 | 0.10                          | 0.04                          | 0.14                   | 3.72                   | 1, 21      | 0.07            |                 |
|                             | Number of play partners present              | 0.00     | 0.01          | -0.19         | -0.94    | 0.36     | [-0.02, 0.01] |               |                      |                               |                               |                        |                        |            |                 |                 |
|                             | Sex                                          | 0.01     | 0.01          | 0.15          | 0.72     | 0.48     | [-0.01, 0.03] |               |                      |                               |                               |                        |                        |            |                 |                 |
|                             | Second semester gestational T-DHT (Centered) | -0.05    | 0.03          | -0.38         | -1.93    | 0.07     | [-0.11, 0.01] |               |                      |                               |                               |                        |                        |            |                 |                 |
|                             | <b>Intercept Model 4</b>                     | 0.05     | 0.03          |               | 2.07     | 0.05     | [0, 0.11]     | 0.47          | 0.22                 | 0.07                          | 0.04                          | 0.01                   | 0.19                   | 1, 20      | 0.66            |                 |
|                             | Number of play partners present              | -0.01    | 0.01          | -0.21         | -0.99    | 0.33     | [-0.02, 0.01] |               |                      |                               |                               |                        |                        |            |                 |                 |
|                             | Sex                                          | 0.01     | 0.01          | 0.14          | 0.69     | 0.50     | [-0.02, 0.03] |               |                      |                               |                               |                        |                        |            |                 |                 |
|                             | Second semester gestational T-DHT (Centered) | -0.05    | 0.03          | -0.38         | -1.85    | 0.08     | [-0.11, 0.01] |               |                      |                               |                               |                        |                        |            |                 |                 |
|                             | Sex * gestational T-DHT interaction          | 0.01     | 0.03          | 0.09          | 0.44     | 0.66     | [-0.05, 0.07] |               |                      |                               |                               |                        |                        |            |                 |                 |
|                             | <hr/>                                        |          |               |               |          |          |               |               |                      |                               |                               |                        |                        |            |                 |                 |
|                             |                                              |          | <b>b</b>      | <b>SE (b)</b> | <b>β</b> | <i>t</i> | <i>p</i>      | <b>95% CI</b> | <b>R</b>             | <b>R<sup>2</sup></b>          | <b>Adjusted R<sup>2</sup></b> | <b>SE (estimate)</b>   | <b>R<sup>2</sup> Δ</b> | <b>F Δ</b> | <b>df</b>       | <b>Sig. F Δ</b> |
| <b>Overall Play Mother</b>  | <b>Intercept Model 1</b>                     | 0.55     | 0.21          |               | 2.60     | 0.02     | [0.12, 0.99]  | 0.28          | 0.08                 | 0.04                          | 0.34                          | 0.08                   | 2.12                   | 1, 25      | 0.16            |                 |
|                             | Number of play partners present              | -0.06    | 0.04          | -0.28         | -1.46    | 0.16     | [-0.14, 0.03] |               |                      |                               |                               |                        |                        |            |                 |                 |
|                             | <b>Intercept Model 2</b>                     | 0.47     | 0.21          |               | 2.18     | 0.04     | [0.03, 0.91]  | 0.39          | 0.15                 | 0.08                          | 0.34                          | 0.07                   | 2.10                   | 1, 24      | 0.16            |                 |
|                             | Number of play partners present              | -0.04    | 0.04          | -0.20         | -1.05    | 0.31     | [-0.13, 0.05] |               |                      |                               |                               |                        |                        |            |                 |                 |
|                             | Sex                                          | 0.10     | 0.07          | 0.28          | 1.45     | 0.16     | [-0.05, 0.24] |               |                      |                               |                               |                        |                        |            |                 |                 |
|                             | <b>Intercept Model 3</b>                     | 0.45     | 0.22          |               | 2.02     | 0.06     | [-0.02, 0.91] | 0.40          | 0.16                 | 0.05                          | 0.34                          | 0.01                   | 0.20                   | 1, 23      | 0.66            |                 |
|                             | Number of play partners present              | -0.04    | 0.04          | -0.19         | -0.92    | 0.37     | [-0.13, 0.05] |               |                      |                               |                               |                        |                        |            |                 |                 |
|                             | Sex                                          | 0.10     | 0.07          | 0.30          | 1.48     | 0.15     | [-0.05, 0.25] |               |                      |                               |                               |                        |                        |            |                 |                 |
|                             | Second semester gestational T-DHT (Centered) | 0.10     | 0.23          | 0.09          | 0.45     | 0.66     | [-0.38, 0.58] |               |                      |                               |                               |                        |                        |            |                 |                 |
|                             | <b>Intercept Model 4</b>                     | 0.50     | 0.23          |               | 2.19     | 0.04     | [0.03, 0.98]  | 0.44          | 0.20                 | 0.05                          | 0.34                          | 0.04                   | 1.01                   | 1, 22      | 0.33            |                 |
|                             | Number of play partners present              | -0.05    | 0.04          | -0.23         | -1.10    | 0.28     | [-0.14, 0.05] |               |                      |                               |                               |                        |                        |            |                 |                 |
|                             | Sex                                          | 0.10     | 0.07          | 0.29          | 1.44     | 0.17     | [-0.05, 0.25] |               |                      |                               |                               |                        |                        |            |                 |                 |
|                             | Second semester gestational T-DHT (Centered) | 0.12     | 0.23          | 0.10          | 0.52     | 0.61     | [-0.36, 0.6]  |               |                      |                               |                               |                        |                        |            |                 |                 |
|                             | Sex * gestational T-DHT interaction          | 0.23     | 0.23          | 0.20          | 1.00     | 0.33     | [-0.25, 0.71] |               |                      |                               |                               |                        |                        |            |                 |                 |

|                             |                                              | <b>b</b> | <b>SE (b)</b> | <b>β</b>      | <i>t</i> | <i>p</i> | <b>95% CI</b>  | <b>R</b>      | <b>R<sup>2</sup></b> | <b>Adjusted R<sup>2</sup></b> | <b>SE (estimate)</b>          | <b>R<sup>2</sup> Δ</b> | <b>F Δ</b>             | <b>df</b>  | <b>Sig. F Δ</b> |                 |
|-----------------------------|----------------------------------------------|----------|---------------|---------------|----------|----------|----------------|---------------|----------------------|-------------------------------|-------------------------------|------------------------|------------------------|------------|-----------------|-----------------|
| <b>Initiate Play Father</b> | <b>Intercept Model 1</b>                     | 1.09     | 0.21          |               | 5.24     | 0.00     | [0.67, 1.53]   | 0.64          | 0.42                 | 0.39                          | 0.34                          | 0.42                   | 17.76                  | 1, 25      | 0.00            |                 |
|                             | Number of play partners present              | -0.16    | 0.04          | -0.64         | -4.21    | 0.00     | [-0.25, -0.09] |               |                      |                               |                               |                        |                        |            |                 |                 |
|                             | <b>Intercept Model 2</b>                     | 1.05     | 0.22          |               | 4.80     | 0.00     | [0.6, 1.5]     | 0.66          | 0.43                 | 0.38                          | 0.34                          | 0.01                   | 0.62                   | 1, 24      | 0.44            |                 |
|                             | Number of play partners present              | -0.15    | 0.04          | -0.61         | -3.82    | 0.00     | [-0.24, -0.08] |               |                      |                               |                               |                        |                        |            |                 |                 |
|                             | Sex                                          | 0.05     | 0.07          | 0.13          | 0.78     | 0.44     | [-0.09, 0.2]   |               |                      |                               |                               |                        |                        |            |                 |                 |
|                             | <b>Intercept Model 3</b>                     | 1.02     | 0.22          |               | 4.54     | 0.00     | [0.56, 1.49]   | 0.66          | 0.44                 | 0.37                          | 0.35                          | 0.01                   | 0.40                   | 1, 23      | 0.53            |                 |
|                             | Number of play partners present              | -0.15    | 0.04          | -0.59         | -3.57    | 0.00     | [-0.24, -0.07] |               |                      |                               |                               |                        |                        |            |                 |                 |
|                             | Sex                                          | 0.06     | 0.07          | 0.15          | 0.88     | 0.39     | [-0.09, 0.21]  |               |                      |                               |                               |                        |                        |            |                 |                 |
|                             | Second semester gestational T-DHT (Centered) | 0.15     | 0.23          | 0.10          | 0.63     | 0.53     | [-0.34, 0.63]  |               |                      |                               |                               |                        |                        |            |                 |                 |
|                             | <b>Intercept Model 4</b>                     | 1.09     | 0.23          |               | 4.81     | 0.00     | [0.62, 1.56]   | 0.70          | 0.48                 | 0.39                          | 0.34                          | 0.04                   | 1.88                   | 1, 22      | 0.18            |                 |
|                             | Number of play partners present              | -0.16    | 0.04          | -0.63         | -3.84    | 0.00     | [-0.25, -0.08] |               |                      |                               |                               |                        |                        |            |                 |                 |
|                             | Sex                                          | 0.06     | 0.07          | 0.13          | 0.83     | 0.41     | [-0.09, 0.21]  |               |                      |                               |                               |                        |                        |            |                 |                 |
|                             | Second semester gestational T-DHT (Centered) | 0.17     | 0.23          | 0.12          | 0.75     | 0.46     | [-0.31, 0.65]  |               |                      |                               |                               |                        |                        |            |                 |                 |
|                             | Sex * gestational T-DHT interaction          | 0.31     | 0.23          | 0.22          | 1.37     | 0.18     | [-0.17, 0.79]  |               |                      |                               |                               |                        |                        |            |                 |                 |
|                             | <hr/>                                        |          |               |               |          |          |                |               |                      |                               |                               |                        |                        |            |                 |                 |
|                             |                                              |          | <b>b</b>      | <b>SE (b)</b> | <b>β</b> | <i>t</i> | <i>p</i>       | <b>95% CI</b> | <b>R</b>             | <b>R<sup>2</sup></b>          | <b>Adjusted R<sup>2</sup></b> | <b>SE (estimate)</b>   | <b>R<sup>2</sup> Δ</b> | <b>F Δ</b> | <b>df</b>       | <b>Sig. F Δ</b> |
| <b>Receive Father</b>       | <b>Intercept Model 1</b>                     | 0.16     | 0.06          |               | 2.78     | 0.01     | [0.05, 0.29]   | 0.28          | 0.08                 | 0.04                          | 0.09                          | 0.08                   | 2.10                   | 1, 25      | 0.16            |                 |
|                             | Number of play partners present              | -0.02    | 0.01          | -0.28         | -1.45    | 0.16     | [-0.04, 0.01]  |               |                      |                               |                               |                        |                        |            |                 |                 |
|                             | <b>Intercept Model 2</b>                     | 0.17     | 0.06          |               | 2.81     | 0.01     | [0.05, 0.3]    | 0.30          | 0.09                 | 0.02                          | 0.10                          | 0.01                   | 0.39                   | 1, 24      | 0.54            |                 |
|                             | Number of play partners present              | -0.02    | 0.01          | -0.31         | -1.55    | 0.13     | [-0.05, 0.01]  |               |                      |                               |                               |                        |                        |            |                 |                 |
|                             | Sex                                          | -0.01    | 0.02          | -0.13         | -0.62    | 0.54     | [-0.06, 0.03]  |               |                      |                               |                               |                        |                        |            |                 |                 |
|                             | <b>Intercept Model 3</b>                     | 0.18     | 0.06          |               | 2.88     | 0.01     | [0.06, 0.31]   | 0.34          | 0.11                 | 0.00                          | 0.10                          | 0.02                   | 0.56                   | 1, 23      | 0.46            |                 |
|                             | Number of play partners present              | -0.02    | 0.01          | -0.34         | -1.65    | 0.11     | [-0.05, 0.01]  |               |                      |                               |                               |                        |                        |            |                 |                 |
|                             | Sex                                          | -0.01    | 0.02          | -0.16         | -0.75    | 0.46     | [-0.06, 0.03]  |               |                      |                               |                               |                        |                        |            |                 |                 |
|                             | Second semester gestational T-DHT (Centered) | -0.05    | 0.06          | -0.15         | -0.75    | 0.46     | [-0.19, 0.09]  |               |                      |                               |                               |                        |                        |            |                 |                 |
|                             | <b>Intercept Model 4</b>                     | 0.18     | 0.07          |               | 2.74     | 0.01     | [0.05, 0.32]   | 0.34          | 0.11                 | -0.05                         | 0.10                          | 0.00                   | 0.00                   | 1, 22      | 1.00            |                 |
|                             | Number of play partners present              | -0.02    | 0.01          | -0.34         | -1.58    | 0.13     | [-0.05, 0.01]  |               |                      |                               |                               |                        |                        |            |                 |                 |
|                             | Sex                                          | -0.01    | 0.02          | -0.16         | -0.73    | 0.47     | [-0.06, 0.03]  |               |                      |                               |                               |                        |                        |            |                 |                 |
|                             | Second semester gestational T-DHT (Centered) | -0.05    | 0.07          | -0.15         | -0.73    | 0.47     | [-0.19, 0.09]  |               |                      |                               |                               |                        |                        |            |                 |                 |
|                             | Sex * gestational T-DHT interaction          | 0.00     | 0.07          | 0.00          | 0.00     | 1.00     | [-0.14, 0.14]  |               |                      |                               |                               |                        |                        |            |                 |                 |
|                             | <hr/>                                        |          |               |               |          |          |                |               |                      |                               |                               |                        |                        |            |                 |                 |
|                             |                                              |          | <b>b</b>      | <b>SE (b)</b> | <b>β</b> | <i>t</i> | <i>p</i>       | <b>95% CI</b> | <b>R</b>             | <b>R<sup>2</sup></b>          | <b>Adjusted R<sup>2</sup></b> | <b>SE (estimate)</b>   | <b>R<sup>2</sup> Δ</b> | <b>F Δ</b> | <b>df</b>       | <b>Sig. F Δ</b> |
| <b>Overall Play Father</b>  | <b>Intercept Model 1</b>                     | 0.88     | 0.20          |               | 4.50     | 0.00     | [0.48, 1.29]   | 0.57          | 0.32                 | 0.29                          | 0.32                          | 0.32                   | 11.77                  | 1, 25      | 0.00            |                 |
|                             | Number of play partners present              | -0.12    | 0.04          | -0.57         | -3.43    | 0.00     | [-0.2, -0.05]  |               |                      |                               |                               |                        |                        |            |                 |                 |
|                             | <b>Intercept Model 2</b>                     | 0.87     | 0.21          |               | 4.19     | 0.00     | [0.44, 1.3]    | 0.57          | 0.32                 | 0.27                          | 0.33                          | 0.00                   | 0.06                   | 1, 24      | 0.81            |                 |
|                             | Number of play partners present              | -0.12    | 0.04          | -0.55         | -3.18    | 0.00     | [-0.21, -0.05] |               |                      |                               |                               |                        |                        |            |                 |                 |
|                             | Sex                                          | 0.02     | 0.07          | 0.04          | 0.24     | 0.81     | [-0.12, 0.16]  |               |                      |                               |                               |                        |                        |            |                 |                 |
|                             | <b>Intercept Model 3</b>                     | 0.84     | 0.21          |               | 3.94     | 0.00     | [0.41, 1.29]   | 0.58          | 0.33                 | 0.25                          | 0.33                          | 0.01                   | 0.38                   | 1, 23      | 0.54            |                 |
|                             | Number of play partners present              | -0.12    | 0.04          | -0.53         | -2.96    | 0.01     | [-0.21, -0.04] |               |                      |                               |                               |                        |                        |            |                 |                 |
|                             | Sex                                          | 0.02     | 0.07          | 0.06          | 0.35     | 0.73     | [-0.12, 0.17]  |               |                      |                               |                               |                        |                        |            |                 |                 |
|                             | Second semester gestational T-DHT (Centered) | 0.14     | 0.22          | 0.11          | 0.62     | 0.54     | [-0.33, 0.6]   |               |                      |                               |                               |                        |                        |            |                 |                 |
|                             | <b>Intercept Model 4</b>                     | 0.90     | 0.22          |               | 4.16     | 0.00     | [0.46, 1.36]   | 0.61          | 0.38                 | 0.26                          | 0.33                          | 0.04                   | 1.50                   | 1, 22      | 0.23            |                 |
|                             | Number of play partners present              | -0.13    | 0.04          | -0.58         | -3.17    | 0.00     | [-0.22, -0.05] |               |                      |                               |                               |                        |                        |            |                 |                 |
|                             | Sex                                          | 0.02     | 0.07          | 0.05          | 0.29     | 0.77     | [-0.12, 0.16]  |               |                      |                               |                               |                        |                        |            |                 |                 |
|                             | Second semester gestational T-DHT (Centered) | 0.16     | 0.22          | 0.12          | 0.72     | 0.48     | [-0.3, 0.62]   |               |                      |                               |                               |                        |                        |            |                 |                 |
|                             | Sex * gestational T-DHT interaction          | 0.27     | 0.22          | 0.21          | 1.23     | 0.23     | [-0.19, 0.73]  |               |                      |                               |                               |                        |                        |            |                 |                 |

|                                |                                              | <b>b</b> | <b>SE (b)</b> | <b>β</b> | <i>t</i> | <i>p</i> | <b>95% CI</b>  | <b>R</b> | <b>R<sup>2</sup></b> | <b>Adjusted R<sup>2</sup></b> | <b>SE (estimate)</b> | <b>R<sup>2</sup> Δ</b> | <b>F Δ</b> | <b>df</b> | <b>Sig. F Δ</b> |
|--------------------------------|----------------------------------------------|----------|---------------|----------|----------|----------|----------------|----------|----------------------|-------------------------------|----------------------|------------------------|------------|-----------|-----------------|
| <b>Initiate Play Male Sib*</b> | <b>Intercept Model 1</b>                     | 1.24     | 0.40          |          | 3.12     | 0.01     | [0.41, 2.06]   | 0.27     | 0.07                 | 0.03                          | 0.83                 | 0.07                   | 1.60       | 1, 21     | 0.22            |
|                                | Number of male siblings present              | -0.37    | 0.30          | -0.27    | -1.27    | 0.22     | [-0.99, 0.24]  |          |                      |                               |                      |                        |            |           |                 |
|                                | <b>Intercept Model 2</b>                     | 1.24     | 0.41          |          | 3.05     | 0.01     | [0.39, 2.09]   | 0.27     | 0.07                 | -0.02                         | 0.85                 | 0.00                   | 0.02       | 1, 20     | 0.89            |
|                                | Number of male siblings present              | -0.37    | 0.30          | -0.27    | -1.23    | 0.23     | [-1.01, 0.26]  |          |                      |                               |                      |                        |            |           |                 |
|                                | Sex                                          | 0.03     | 0.18          | 0.03     | 0.14     | 0.89     | [-0.35, 0.40]  |          |                      |                               |                      |                        |            |           |                 |
|                                | <b>Intercept Model 3</b>                     | 2.82     | 0.46          |          | 6.09     | 0.00     | [1.85, 3.79]   | 0.74     | 0.54                 | 0.47                          | 0.61                 | 0.47                   | 19.45      | 1, 19     | 0.00            |
|                                | Number of male siblings present              | -0.67    | 0.23          | -0.48    | -2.93    | 0.01     | [-1.15, -0.19] |          |                      |                               |                      |                        |            |           |                 |
|                                | Sex                                          | -0.13    | 0.13          | -0.15    | -0.96    | 0.35     | [-0.41, 0.15]  |          |                      |                               |                      |                        |            |           |                 |
|                                | Second semester gestational T-DHT (Centered) | -2.06    | 0.47          | -0.74    | -4.41    | 0.00     | [-3.04, -1.08] |          |                      |                               |                      |                        |            |           |                 |
|                                | <b>Intercept Model 4</b>                     | 2.83     | 0.48          |          | 5.90     | 0.00     | [1.82, 3.84]   | 0.74     | 0.54                 | 0.44                          | 0.63                 | 0.00                   | 0.01       | 1, 18     | 0.94            |
|                                | Number of male siblings present              | -0.67    | 0.24          | -0.48    | -2.84    | 0.01     | [-1.17, -0.17] |          |                      |                               |                      |                        |            |           |                 |
|                                | Sex                                          | -0.13    | 0.14          | -0.16    | -0.93    | 0.36     | [-0.42, 0.16]  |          |                      |                               |                      |                        |            |           |                 |
|                                | Second semester gestational T-DHT (Centered) | -2.08    | 0.52          | -0.74    | -4.02    | 0.00     | [-3.17, -0.99] |          |                      |                               |                      |                        |            |           |                 |
|                                | Sex * gestational T-DHT interaction          | -0.04    | 0.50          | -0.01    | -0.08    | 0.94     | [-1.10, 1.02]  |          |                      |                               |                      |                        |            |           |                 |
|                                |                                              | <b>b</b> | <b>SE (b)</b> | <b>β</b> | <i>t</i> | <i>p</i> | <b>95% CI</b>  | <b>R</b> | <b>R<sup>2</sup></b> | <b>Adjusted R<sup>2</sup></b> | <b>SE (estimate)</b> | <b>R<sup>2</sup> Δ</b> | <b>F Δ</b> | <b>df</b> | <b>Sig. F Δ</b> |
| <b>Receive Play Male Sib*</b>  | <b>Intercept Model 1</b>                     | 0.64     | 0.32          |          | 2.04     | 0.05     | [-0.02, 1.31]  | 0.39     | 0.15                 | 0.11                          | 0.78                 | 0.15                   | 3.47       | 1, 20     | 0.08            |
|                                | Number of male siblings present              | 0.47     | 0.25          | 0.38     | 1.86     | 0.08     | [-0.06, 1]     |          |                      |                               |                      |                        |            |           |                 |
|                                | <b>Intercept Model 2</b>                     | 0.69     | 0.33          |          | 2.09     | 0.05     | [0.01, 1.38]   | 0.41     | 0.16                 | 0.08                          | 0.79                 | 0.02                   | 0.37       | 1, 19     | 0.55            |
|                                | Number of male siblings present              | 0.43     | 0.26          | 0.35     | 1.63     | 0.12     | [-0.13, 0.99]  |          |                      |                               |                      |                        |            |           |                 |
|                                | Sex                                          | -0.11    | 0.17          | -0.13    | -0.61    | 0.55     | [-0.48, 0.26]  |          |                      |                               |                      |                        |            |           |                 |
|                                | <b>Intercept Model 3</b>                     | 0.73     | 0.35          |          | 2.10     | 0.05     | [-0.01, 1.46]  | 0.42     | 0.17                 | 0.04                          | 0.81                 | 0.01                   | 0.21       | 1, 18     | 0.65            |
|                                | Number of male siblings present              | 0.40     | 0.28          | 0.33     | 1.42     | 0.17     | [-0.2, 0.99]   |          |                      |                               |                      |                        |            |           |                 |
|                                | Sex                                          | -0.12    | 0.18          | -0.15    | -0.68    | 0.51     | [-0.51, 0.26]  |          |                      |                               |                      |                        |            |           |                 |
|                                | Second semester gestational T-DHT (Centered) | -0.28    | 0.61          | -0.10    | -0.46    | 0.65     | [-1.56, 1]     |          |                      |                               |                      |                        |            |           |                 |
|                                | <b>Intercept Model 4</b>                     | 0.76     | 0.35          |          | 2.14     | 0.05     | [0.02, 1.51]   | 0.44     | 0.20                 | 0.01                          | 0.82                 | 0.02                   | 0.50       | 1, 17     | 0.49            |
|                                | Number of male siblings present              | 0.38     | 0.28          | 0.31     | 1.35     | 0.19     | [-0.22, 0.99]  |          |                      |                               |                      |                        |            |           |                 |
|                                | Sex                                          | -0.12    | 0.18          | -0.15    | -0.67    | 0.51     | [-0.52, 0.27]  |          |                      |                               |                      |                        |            |           |                 |
|                                | Second semester gestational T-DHT (Centered) | -0.24    | 0.62          | -0.09    | -0.38    | 0.71     | [-1.55, 1.07]  |          |                      |                               |                      |                        |            |           |                 |
|                                | Sex * gestational T-DHT interaction          | 0.42     | 0.60          | 0.15     | 0.71     | 0.49     | [-0.85, 1.69]  |          |                      |                               |                      |                        |            |           |                 |
|                                |                                              | <b>b</b> | <b>SE (b)</b> | <b>β</b> | <i>t</i> | <i>p</i> | <b>95% CI</b>  | <b>R</b> | <b>R<sup>2</sup></b> | <b>Adjusted R<sup>2</sup></b> | <b>SE (estimate)</b> | <b>R<sup>2</sup> Δ</b> | <b>F Δ</b> | <b>df</b> | <b>Sig. F Δ</b> |
| <b>Overall Play Male Sib*</b>  | <b>Intercept Model 1</b>                     | 1.62     | 0.40          |          | 4.02     | 0.00     | [0.78, 2.46]   | 0.11     | 0.01                 | -0.04                         | 0.99                 | 0.01                   | 0.24       | 1, 20     | 0.63            |
|                                | Number of male siblings present              | 0.16     | 0.32          | 0.11     | 0.49     | 0.63     | [-0.52, 0.83]  |          |                      |                               |                      |                        |            |           |                 |
|                                | <b>Intercept Model 2</b>                     | 1.60     | 0.42          |          | 3.78     | 0.00     | [0.72, 2.49]   | 0.12     | 0.01                 | -0.09                         | 1.01                 | 0.00                   | 0.03       | 1, 19     | 0.86            |
|                                | Number of male siblings present              | 0.17     | 0.34          | 0.12     | 0.50     | 0.62     | [-0.54, 0.89]  |          |                      |                               |                      |                        |            |           |                 |
|                                | Sex                                          | 0.04     | 0.22          | 0.04     | 0.18     | 0.86     | [-0.43, 0.51]  |          |                      |                               |                      |                        |            |           |                 |
|                                | <b>Intercept Model 3</b>                     | 1.78     | 0.41          |          | 4.34     | 0.00     | [0.92, 2.64]   | 0.41     | 0.17                 | 0.03                          | 0.96                 | 0.16                   | 3.42       | 1, 18     | 0.08            |
|                                | Number of male siblings present              | 0.01     | 0.33          | 0.01     | 0.02     | 0.98     | [-0.69, 0.71]  |          |                      |                               |                      |                        |            |           |                 |
|                                | Sex                                          | -0.04    | 0.22          | -0.04    | -0.19    | 0.85     | [-0.5, 0.42]   |          |                      |                               |                      |                        |            |           |                 |
|                                | Second semester gestational T-DHT (Centered) | -1.33    | 0.72          | -0.42    | -1.85    | 0.08     | [-2.85, 0.19]  |          |                      |                               |                      |                        |            |           |                 |
|                                | <b>Intercept Model 4</b>                     | 1.77     | 0.42          |          | 4.17     | 0.00     | [0.88, 2.67]   | 0.42     | 0.17                 | -0.02                         | 0.98                 | 0.00                   | 0.03       | 1, 17     | 0.87            |
|                                | Number of male siblings present              | 0.01     | 0.34          | 0.01     | 0.03     | 0.98     | [-0.72, 0.74]  |          |                      |                               |                      |                        |            |           |                 |
|                                | Sex                                          | -0.04    | 0.22          | -0.04    | -0.18    | 0.86     | [-0.51, 0.43]  |          |                      |                               |                      |                        |            |           |                 |
|                                | Second semester gestational T-DHT (Centered) | -1.34    | 0.74          | -0.42    | -1.81    | 0.09     | [-2.92, 0.23]  |          |                      |                               |                      |                        |            |           |                 |
|                                | Sex * gestational T-DHT interaction          | -0.12    | 0.72          | -0.04    | -0.16    | 0.87     | [-1.64, 1.41]  | 1.40     |                      |                               |                      |                        |            |           |                 |
